1 **Research Article**

2

3 **Factors associated with differential seropositivity to *Leptospira interrogans* and**

4 ***Leptospira kirschneri* in a high transmission urban setting for leptospirosis in**

5 **Brazil**

6

7 **Running Title: Seropositivity of two *Leptospira* serogroups in urban residents**

8

9 Daiana de Oliveira<sup>1,2</sup>, Hussein Khalil<sup>3</sup>, Fabiana Almerinda G. Palma<sup>1</sup>, Roberta Santana<sup>1</sup>,

10 Nivison Nery Jr<sup>1,2</sup>, Juan C. Quintero-Vélez<sup>4,5,6</sup>, Caio Graco Zeppelini<sup>7</sup>, Gielson Almeida

11 do Sacramento<sup>2</sup>, Jaqueline Cruz<sup>2</sup>, Ricardo Lustosa<sup>1</sup>, Igor Santana Ferreira<sup>1</sup>, Ticiana

12 Carvalho-Pereira<sup>1</sup>, Peter J Diggle<sup>8</sup>, Elsie A. Wunder Jr<sup>2,9</sup>, Albert I. Ko<sup>2,9</sup>, Yeimi Alzate

13 Lopez<sup>1</sup>, Mike Begon<sup>10</sup>, Mitermayer G. Reis<sup>2,9,11</sup>, Federico Costa<sup>1,2,9</sup>.

14

15 <sup>1</sup> Instituto da Saúde Coletiva, Universidade Federal da Bahia, Rua Basílio da Gama,

16 316, Canela, CEP 40110-040, Salvador, Bahia, Brasil

17 <sup>2</sup> Instituto Gonçalo Moniz, Fundação Oswaldo Cruz, Ministério da Saúde, Rua

18 Waldemar Falcão, 121, Candeal, CEP 40296-710, Salvador, Bahia, Brasil

19 <sup>3</sup> Department of Wildlife, Fish, and Environmental Studies, Swedish University of

20 Agricultural Sciences, Umeå, Sweden

21 <sup>4</sup> Grupo de Ciencias Veterinarias - Centauro, Facultad de Ciencias Agrarias,

22 Universidad de Antioquia, Medellín, Colombia

23 <sup>5</sup> Grupo de Investigación Microbiología Básica y Aplicada, Universidad de Antioquia,

24 Medellín, Colombia

25 <sup>6</sup> Grupo de Epidemiología, Universidad de Antioquia, Medellín, Colombia

NOTE: This preprint reports new research that has not been certified by peer review and should not be used to guide clinical practice.

26 <sup>7</sup> Programa de Pós-Graduação em Ecologia: Teoria, Aplicações e Valores, Universidade  
27 Federal da Bahia, Brazil.

28 <sup>8</sup> Centre for Health Informatics, Computing, and Statistics, Lancaster University, UK

29 <sup>9</sup> Department of Epidemiology of Microbial Diseases, Yale School of Public Health, 60  
30 College St, New Haven, Connecticut, 06510, USA

31 <sup>10</sup> Institute of Integrative Biology, University of Liverpool, UK

32 <sup>11</sup> Faculdade de Medicina, Universidade Federal da Bahia, Praça XV de novembro, s/n -  
33 Largo do Terreiro de Jesus, CEP 40026-010, Salvador, Bahia, Brasil

34

35 **Keywords:** leptospirosis, determinants, seroprevalence, co-circulation.

36 <sup>&</sup>**Correspondence author:** Federico Costa ([federico.costa@ufba.br](mailto:federico.costa@ufba.br))

37

38 **Funding source:**

39 The study was funded by Medical Research Council (UK). Grant number: MR/  
40 P024084/1 to MB, Fundação de Amparo à Pesquisa do Estado da Bahia (BR) Grant  
41 number: 10206/2015, Wellcome Trust (UK) Grant number:102330/Z/13/Z and National  
42 Institutes of Health (US) Grant numbers: R01TW009504 and R01AI121207.

43

44 **Conflicts of Interest:** The authors declare that there is no conflict of interest.

45

46 **Abstract**

47 **Background**

48 Leptospirosis is a zoonosis caused by pathogenic species of bacteria belonging to the  
49 genus *Leptospira*. Most studies infer the epidemiological patterns of a single serogroup  
50 or aggregate all serogroups to estimate overall seropositivity, thus not exploring the  
51 risks of exposure to distinct serogroups. The present study aims to delineate the  
52 demographic, socioeconomic and environmental factors associated with seropositivity  
53 of *Leptospira* serogroup Icterohaemorrhagiae and serogroup Cynopteri in an urban high  
54 transmission setting for leptospirosis in Brazil.

55 **Methods/Principal Findings**

56 We performed a cross-sectional serological study in five urban informal communities in  
57 the city of Salvador, Brazil. During the years 2018, 2020 2021, we recruited 2.808  
58 residents and collected blood samples for serological analysis using microagglutination  
59 assays. We used a mixed-effect multinomial logistic regression model to identify risk  
60 factors associated with seropositivity for each serogroup. Seropositivity to Cynopteri  
61 increased with age in years (OR 1.03; 95% CI 1.01-1.06) and was higher in those living  
62 in houses with unplaster walls (exposed brick) (OR 1.68; 95% CI 1.09-2.59) and where  
63 cats were present near the household (OR 2.00; 95% CI 1.03-3.88). Seropositivity to  
64 Icterohaemorrhagiae also increased with age in years (OR 1.02; 95% CI 1.01-1.03) but  
65 was higher in males (OR 1.51; 95% CI 1.09-2.10), in those with work-related exposures  
66 (OR 1.71; 95% CI 1.10-2.66) or who had contact with sewage (OR 1.42; 95% CI 1.00-  
67 2.03). Spatial analysis showed differences in distribution of seropositivity to serogroups  
68 Icterohaemorrhagiae and Cynopteri within the five districts where study communities  
69 were situated.

70 **Conclusions/Significance**

71 Our data suggests distinct epidemiological patterns associated with serogroups  
72 Icterohaemorrhagiae and Cynopteri within the high-risk urban environment for  
73 leptospirosis and with differences of spatial niches. Future studies must identify the  
74 different pathogenic serogroups circulating in low-income areas, and further evaluate  
75 the potential role of cats in the transmission of the serogroup Cynopteri in urban  
76 settings.  
77

## 78 **Introduction**

79           Leptospirosis is a potentially severe infectious disease that affects animals (both  
80 domestic and wild) and humans [1]. The disease is caused by pathogenic species of the  
81 genus *Leptospira* that causes a wide array of clinical manifestations in humans [2].  
82 Symptoms can range from asymptomatic infection and light fever to severe  
83 manifestations with risk of death [3]. Over a million cases occur globally every year,  
84 causing over 60 thousand deaths [4]. The majority of the disease burden occurs in  
85 developing nations that lack adequate infrastructure and health services [5]. Human  
86 infection occurs through direct contact with urine or contaminated secretions from  
87 infected animals, or indirectly through contact with contaminated soil and water [1,6].

88           The genus *Leptospira* comprises 69 species and over 300 serovars, classified in  
89 more than 20 serogroups [7–9]. The microscopic agglutination test (MAT) is the golden  
90 standard serodiagnosis for leptospirosis and can indicate the presumptive infecting  
91 serogroup [10]. However, isolation or specific laboratory techniques like DNA sequence  
92 analysis are needed for definitive serotyping [11]. Some serovars can infect multiple  
93 animal species while others are more adapted to specific animal hosts [2]. This host  
94 preference might explain why some serovars/serogroups are more frequent in certain  
95 geographic areas. The diversity of reservoirs, serovars and serogroups, together with  
96 environmental and socio-behavioral determinants, pose a challenge to the  
97 characterization of the epidemiologic patterns of leptospirosis. These factors can  
98 influence the risk of transmission, and consequently, increase incidence and cause  
99 outbreaks [12].

100           Historically, tropical and subtropical nations have seasonal leptospirosis  
101 incidence peaks associated with heavy rainfall and flooding events during the rainy  
102 season [12–15]. The informal accelerated expansion of large urban centers, coupled

103 with inadequate housing and sanitation, has resulted in environmental and social  
104 conditions highly favorable to disease hosts and pathogen transmission [16]. Over 33%  
105 of the world population live in urban poor communities [17], a figure around 28% in  
106 Brazil [18], where, because of the deep social inequalities, there is a direct correlation  
107 between vulnerable environments, disaster risks and public health problems [19,20].  
108 Historically, in the city of Salvador, where most of the population is of black and mixed  
109 races, people with lower income to live in the peripheral areas of cities without access to  
110 basic rights, and where the prevalence of health problems such as leptospirosis is greater  
111 than in other areas of the city.

112 Studies performed in the past two decades in Salvador, Brazil, reported  
113 *Leptospira interrogans* serogroup Icterohaemorrhagiae serovar Copenhageni (strain  
114 Fiocruz L1-130) as the serogroup responsible for over 95% of the clinical cases  
115 recorded throughout the city [12], as well as asymptomatic infections in residents of the  
116 urban community of Pau da Lima within Salvador [21,22]. The animal reservoir of the  
117 serovar Copenhageni and serogroup Icterohaemorrhagiae is the brown rat (*Rattus*  
118 *norvegicus*), as shown by previous studies in the same community [23,24]. These  
119 studies identified the seroincidence of *Leptospira kirschneri* serogroup Cynopteri (strain  
120 3522C) as the second highest in residents of urban communities [25]. However, the  
121 animal reservoir of this serogroups and the determinants of its transmission, remain  
122 unknown.

123 Thus, investigating the *Leptospira* serologic profile of the residents in urban  
124 communities, accounting for serogroup-specific risk factors, will contribute to a better  
125 understanding of the risk determinants of urban infection and inform the development  
126 of more specific control measures. The present study aims to identify demographic,  
127 socioeconomic, and environmental factors associated with seropositivity of *Leptospira*

128 *interrogans* Icterohaemorrhagiae (strain Fiocruz L1-130) and *Leptospira kirschneri*  
129 Cynopteri (strain 3522C) in residents of five urban low-income communities in  
130 Salvador, Brazil.

131

## 132 **METHODS**

133

### 134 *Ethics statement*

135 The study was approved by the Ethics Committee of Fundação Oswaldo Cruz, Instituto  
136 Gonçalo Moniz (CAAE 45217415.4.0000.0040), the Ethics Committee for Research of  
137 Instituto de Saúde Coletiva (UFBA, 041 / 17-2.245.914.17-2.245.914) and the  
138 Institutional Review Board of Yale University (no. 2000031554).

139

### 140 *Study design*

141 We performed a cross-sectional study in five urban poor communities (Pau da  
142 Lima (PL), Alto do Cabrito (AdC), Marechal Rondon (MR), Nova Constituinte (NC)  
143 and Rio Sena (RS) in the city of Salvador, Bahia, Brazil (Figure 1). In PL, we collected  
144 samples during the period of November 2020 to February 2021. Previous studies in the  
145 area indicated an annual leptospiral incidence of 37.8 infections per thousand [21]. In  
146 the four other communities, namely: AdC, MR, NC and RS, sampling occurred from  
147 April to September 2018. The communities are considered low-income, with precarious  
148 sanitation and infrastructure.

149 Eligible individuals were recruited, and those willing to participate signed a free  
150 consent form and had a small blood sample drawn by a field professional. We applied a  
151 structured questionnaire to provide information on individual characteristics of the  
152 participant, domestic and peri-domestic environmental characteristics, exposure to

153 sources of environmental contamination, and the presence of potential animal  
154 reservoirs.

155 Serological analysis was performed using the Microscopic Agglutination Test  
156 (MAT), the gold standard for human leptospirosis detection, as previously described  
157 [16]. MAT is based on dark-field microscopy detection of serum agglutination samples  
158 from an individual (antibodies) with live *Leptospira* antibodies. We performed  
159 association analysis only for serogroups Icterohaemorrhagiae strain Fiocruz L1-130 and  
160 Cynopteri strain 3522C, which were the most prevalent strains in the regions, according  
161 to our analyses.

162

### 163 ***Outcomes, exposures, and covariates***

164 The outcome of seropositive for leptospirosis was defined as seropositivity  
165 against serogroups Cynopteri and/or Icterohaemorrhagiae. A result was considered  
166 positive if 50% or more leptospire were agglutinated by MAT with a titer of  $\geq 1:50$ .  
167 When agglutination was observed at a dilution of 1:100, the sample was titrated in serial  
168 two-fold dilutions to determine the highest positive titer [25].

169 The main explanatory variables were at the individual-level: age in years (as a  
170 quantitative variable), gender, ethnicity, highest education level achieved, receiving the  
171 Federal government stimulus program (Bolsa Família), employment status, work  
172 involving contact with sewer/garbage/construction materials, use of protective boots,  
173 contact with mud in the last 12 months, walking barefoot outside, and cleaning sewer  
174 canals in the last 12 months. In addition, environmental explanatory variables included  
175 proximity of the household to open sewers, paved access to the household, household  
176 with a backyard, plastered walls (proxy for quality of construction), garbage



177 accumulation near the household, and presence of domestic animals (cats, dogs, and  
178 chickens).

179

### 180 *Spatial descriptive analysis*

181 QGIS version 2.18.20 was used to construct a georeferenced database from  
182 satellite image WorldView-3 May 2017, at 31 cm resolution. The study team identified  
183 households within the study site and marked their positions onto hard copy 1:1,500  
184 scale maps. The image WorldView-3 was acquired by the research project / Institute  
185 Gonçalo de Moniz - IGM - Fiocruz Bahia from the company Stamap, with disclosure  
186 permitted referencing the Copyrights of DigitalGlobe images. Kernel Density  
187 Estimation analysis (KDE) [26], with standard expression for two-dimensional spatial  
188 context:  $\hat{f}(x) = \frac{1}{n \cdot h^2} \sum k\{(x-x_i)/h\}$ , where  $k(u)$  is the kernel function (a bivariate  
189 probability density),  $x_1, \dots, x_n$  are the data-points and  $h$  is the bandwidth, was  
190 performed to complementary analyses to evaluated possible territorial difference of  
191 niches between serogroups Icterohaemorrhagiae and Cynopteri with no overlapping  
192 patters territorial concentration. The study evaluates smoothed spatial distributions of  
193 sites with positive human cases of serogroups Icterohaemorrhagiae and Cynopteri,  
194 considering as a weight factor in the analysis the total number of cases in the household  
195 with distance matrix by 30 meters. The 30-meter distance matrix considered the average  
196 distance traveled by rats per day [27] as a possible exposure factor of households to  
197 serogroups, aiming to compare patterns of the Kernel analysis suitable for the scale of  
198 the maps in the evaluated areas. To determine the smoothed population-adjusted risk  
199 distribution we calculated the ratio of the KDE for positive cases of households to all  
200 households evaluated with residents tested by leptospirosis cases of serogroups  
201 Icterohaemorrhagiae and Cynopteri.

## 202 *Statistical Analysis*

203 We performed a descriptive analysis using relative and absolute frequencies for  
204 qualitative variables and median and interquartile range for quantitative variables.  
205 A mixed-effect multinomial logistic regression model was used to estimate potential  
206 factors associated to seropositivity for both Icterohaemorrhagiae and Cynopteri  
207 serogroups. Variables included in the multivariate analysis were those with  $p < 0.15$  in  
208 the bivariate analysis. The multivariable analyses were performed using the stepwise  
209 method based on the purposeful selection of variables, including both statistical and  
210 research criteria (biological plausibility) [21,28]. Also, “area” (five urban low-income  
211 communities) was include in the final model as a fixed effect. We checked for high  
212 levels of correlation among the predictor models that were selected to be included in the  
213 final model using Variance Inflation Factor (VIF), but VIF values were  $<5$  and thus no  
214 variables were excluded. The best model that explained the outcome was selected  
215 according to Akaike’s Information Criteria (AIC). The linearity assumption was  
216 confirmed before the inclusion of quantitative variables in bivariate and multivariate  
217 models. The seroprevalence are presented with their 95% confidence intervals adjusted  
218 by random effects (neighborhood). All statistical procedures were performed in R  
219 studio, using tidyverse, lme4 and nmet packages [29–32]

220

## 221 **Results**

222 The study included 2,808 residents of five neighborhoods located in Salvador, Brazil  
223 (Fig 1); of which 1,512 were from Pau da Lima, 332 from Marechal Rondon, 367 from  
224 Alto do Cabrito, 304 from Nova Constituinte and 293 from Rio Sena (Table 1). In  
225 general, the population studied was predominantly female (58%; 1,620/2,808) and self-  
226 declared black (51%; 1,422/2,808) (Table 1).

227 Table 1. Descriptive statistics for demography and socioenvironmental variables by area.

| <b>Characteristic</b>         | <b>Overall<br/>N = 2,808<sup>1</sup></b> | <b>Alto do Cabrito<br/>N = 367<sup>1</sup></b> | <b>Marechal Rondon<br/>N = 332<sup>1</sup></b> | <b>Nova Constituinte<br/>N = 304<sup>1</sup></b> | <b>Pau da Lima<br/>N = 1,512<sup>1</sup></b> | <b>Rio Sena<br/>N = 293<sup>1</sup></b> |
|-------------------------------|------------------------------------------|------------------------------------------------|------------------------------------------------|--------------------------------------------------|----------------------------------------------|-----------------------------------------|
| <b>Age (years), n (%)</b>     |                                          |                                                |                                                |                                                  |                                              |                                         |
| 0 to 16                       | 666 (23.7%)                              | 59 (16.1%)                                     | 48 (14.5%)                                     | 72 (23.7%)                                       | 395 (26.1%)                                  | 92 (31.4%)                              |
| 17 to 29                      | 708 (25.2%)                              | 102 (27.8%)                                    | 74 (22.3%)                                     | 74 (24.3%)                                       | 386 (25.5%)                                  | 72 (24.6%)                              |
| 30 to 44                      | 721 (25.7%)                              | 97 (26.4%)                                     | 84 (25.3%)                                     | 87 (28.6%)                                       | 388 (25.7%)                                  | 65 (22.2%)                              |
| > 45                          | 713 (25.4%)                              | 109 (29.7%)                                    | 126 (38.0%)                                    | 71 (23.4%)                                       | 343 (22.7%)                                  | 64 (21.8%)                              |
| <b>Sex, n (%)</b>             |                                          |                                                |                                                |                                                  |                                              |                                         |
| Male                          | 1,188 (42.3%)                            | 159 (43.3%)                                    | 134 (40.4%)                                    | 130 (42.8%)                                      | 639 (42.3%)                                  | 126 (43.0%)                             |
| Female                        | 1,620 (57.7%)                            | 208 (56.7%)                                    | 198 (59.6%)                                    | 174 (57.2%)                                      | 873 (57.7%)                                  | 167 (57.0%)                             |
| <b>Ethnicity, n (%)</b>       |                                          |                                                |                                                |                                                  |                                              |                                         |
| Brown                         | 1,171 (42.3%)                            | 146 (41.4%)                                    | 148 (46.2%)                                    | 115 (38.5%)                                      | 635 (42.0%)                                  | 127 (44.7%)                             |
| Black                         | 1,422 (51.4%)                            | 191 (54.1%)                                    | 151 (47.2%)                                    | 169 (56.5%)                                      | 781 (51.7%)                                  | 130 (45.8%)                             |
| White                         | 155 (5.6%)                               | 16 (4.5%)                                      | 21 (6.6%)                                      | 15 (5.0%)                                        | 76 (5.0%)                                    | 27 (9.5%)                               |
| Others                        | 20 (0.7%)                                | 0 (0.0%)                                       | 0 (0.0%)                                       | 0 (0.0%)                                         | 20 (1.3%)                                    | 0 (0.0%)                                |
| <b>Education, n (%)</b>       |                                          |                                                |                                                |                                                  |                                              |                                         |
| 5 or less                     | 769 (27.4%)                              | 87 (23.7%)                                     | 84 (25.3%)                                     | 80 (26.3%)                                       | 430 (28.4%)                                  | 88 (30.0%)                              |
| 5 to 9                        | 919 (32.7%)                              | 94 (25.6%)                                     | 103 (31.0%)                                    | 87 (28.6%)                                       | 515 (34.1%)                                  | 120 (41.0%)                             |
| 10 to 12                      | 945 (33.7%)                              | 159 (43.3%)                                    | 121 (36.4%)                                    | 116 (38.2%)                                      | 479 (31.7%)                                  | 70 (23.9%)                              |
| Higher Education              | 61 (2.2%)                                | 17 (4.6%)                                      | 7 (2.1%)                                       | 10 (3.3%)                                        | 25 (1.7%)                                    | 2 (0.7%)                                |
| Never studied                 | 114 (4.1%)                               | 10 (2.7%)                                      | 17 (5.1%)                                      | 11 (3.6%)                                        | 63 (4.2%)                                    | 13 (4.4%)                               |
| <b>Employment, n (%)</b>      |                                          |                                                |                                                |                                                  |                                              |                                         |
| No                            | 1,826 (65.0%)                            | 240 (65.4%)                                    | 227 (68.4%)                                    | 206 (67.8%)                                      | 944 (62.4%)                                  | 209 (71.3%)                             |
| Yes                           | 982 (35.0%)                              | 127 (34.6%)                                    | 105 (31.6%)                                    | 98 (32.2%)                                       | 568 (37.6%)                                  | 84 (28.7%)                              |
| <b>Risk occupation, n (%)</b> |                                          |                                                |                                                |                                                  |                                              |                                         |

|                                      |               |             |             |             |               |             |
|--------------------------------------|---------------|-------------|-------------|-------------|---------------|-------------|
| No                                   | 2,593 (92.3%) | 343 (93.5%) | 295 (88.9%) | 289 (95.1%) | 1,391 (92.0%) | 275 (93.9%) |
| Yes                                  | 215 (7.7%)    | 24 (6.5%)   | 37 (11.1%)  | 15 (4.9%)   | 121 (8.0%)    | 18 (6.1%)   |
| Walk barefoot, n (%)                 |               |             |             |             |               |             |
| No                                   | 1,761 (62.7%) | 226 (61.6%) | 227 (68.4%) | 203 (66.8%) | 950 (62.9%)   | 155 (52.9%) |
| Yes                                  | 1,046 (37.3%) | 141 (38.4%) | 105 (31.6%) | 101 (33.2%) | 561 (37.1%)   | 138 (47.1%) |
| Use of boots, n (%)                  |               |             |             |             |               |             |
| No                                   | 2,246 (80.1%) | 307 (83.7%) | 271 (82.1%) | 246 (80.9%) | 1,170 (77.4%) | 252 (86.0%) |
| Yes                                  | 559 (19.9%)   | 60 (16.3%)  | 59 (17.9%)  | 58 (19.1%)  | 341 (22.6%)   | 41 (14.0%)  |
| Cleaned sewage, n (%)                |               |             |             |             |               |             |
| No                                   | 2,238 (89.8%) | 304 (91.8%) | 260 (85.8%) | 229 (85.1%) | 1,223 (91.5%) | 222 (88.1%) |
| Yes                                  | 253 (10.2%)   | 27 (8.2%)   | 43 (14.2%)  | 40 (14.9%)  | 113 (8.5%)    | 30 (11.9%)  |
| Sewage contact, n (%)                |               |             |             |             |               |             |
| No                                   | 2,207 (78.6%) | 319 (86.9%) | 235 (70.8%) | 248 (81.6%) | 1,179 (78.0%) | 226 (77.1%) |
| Yes                                  | 600 (21.4%)   | 48 (13.1%)  | 97 (29.2%)  | 56 (18.4%)  | 332 (22.0%)   | 67 (22.9%)  |
| Open sewer, n (%)                    |               |             |             |             |               |             |
| No                                   | 1,851 (66.0%) | 291 (79.7%) | 201 (60.5%) | 207 (68.1%) | 973 (64.4%)   | 179 (61.1%) |
| Yes                                  | 955 (34.0%)   | 74 (20.3%)  | 131 (39.5%) | 97 (31.9%)  | 539 (35.6%)   | 114 (38.9%) |
| Access to the house is paved?, n (%) |               |             |             |             |               |             |
| No                                   | 701 (25.0%)   | 42 (11.4%)  | 73 (22.0%)  | 65 (21.4%)  | 391 (25.9%)   | 130 (44.4%) |
| Yes                                  | 2,107 (75.0%) | 325 (88.6%) | 259 (78.0%) | 239 (78.6%) | 1,121 (74.1%) | 163 (55.6%) |
| Wall material?, n (%)                |               |             |             |             |               |             |

|                                         |               |             |             |             |               |             |
|-----------------------------------------|---------------|-------------|-------------|-------------|---------------|-------------|
| No                                      | 2,511 (89.4%) | 348 (94.8%) | 292 (88.0%) | 285 (93.8%) | 1,367 (90.4%) | 219 (74.7%) |
| Yes                                     | 297 (10.6%)   | 19 (5.2%)   | 40 (12.0%)  | 19 (6.2%)   | 145 (9.6%)    | 74 (25.3%)  |
| Presence of Cats, n (%)                 |               |             |             |             |               |             |
| No                                      | 2,115 (75.3%) | 285 (77.7%) | 253 (76.2%) | 229 (75.3%) | 1,122 (74.2%) | 226 (77.1%) |
| Yes                                     | 693 (24.7%)   | 82 (22.3%)  | 79 (23.8%)  | 75 (24.7%)  | 390 (25.8%)   | 67 (22.9%)  |
| Presence of Dogs, n (%)                 |               |             |             |             |               |             |
| No                                      | 1,716 (61.1%) | 213 (58.0%) | 224 (67.5%) | 164 (53.9%) | 968 (64.0%)   | 147 (50.2%) |
| Yes                                     | 1,092 (38.9%) | 154 (42.0%) | 108 (32.5%) | 140 (46.1%) | 544 (36.0%)   | 146 (49.8%) |
| Presence of Chickens, n (%)             |               |             |             |             |               |             |
| No                                      | 2,670 (95.1%) | 338 (92.1%) | 318 (95.8%) | 268 (88.2%) | 1,471 (97.3%) | 275 (93.9%) |
| Yes                                     | 138 (4.9%)    | 29 (7.9%)   | 14 (4.2%)   | 36 (11.8%)  | 41 (2.7%)     | 18 (6.1%)   |
| <i>Leptospira</i> seropositivity, n (%) |               |             |             |             |               |             |
| Icterohaemorrhagiae                     | 208 (7.4%)    | 24 (6.5%)   | 24 (7.2%)   | 23 (7.6%)   | 114 (7.5%)    | 23 (7.8%)   |
| Cynopteri                               | 45 (1.6%)     | 6 (1.6%)    | 7 (2.1%)    | 3 (1.0%)    | 23 (1.5%)     | 6 (2.0%)    |
| No infection                            | 2,555 (91.0%) | 337 (91.8%) | 301 (90.7%) | 278 (91.4%) | 1,375 (90.9%) | 264 (90.1%) |

---

<sup>1</sup>Mean (SD) or Frequency (%)

229

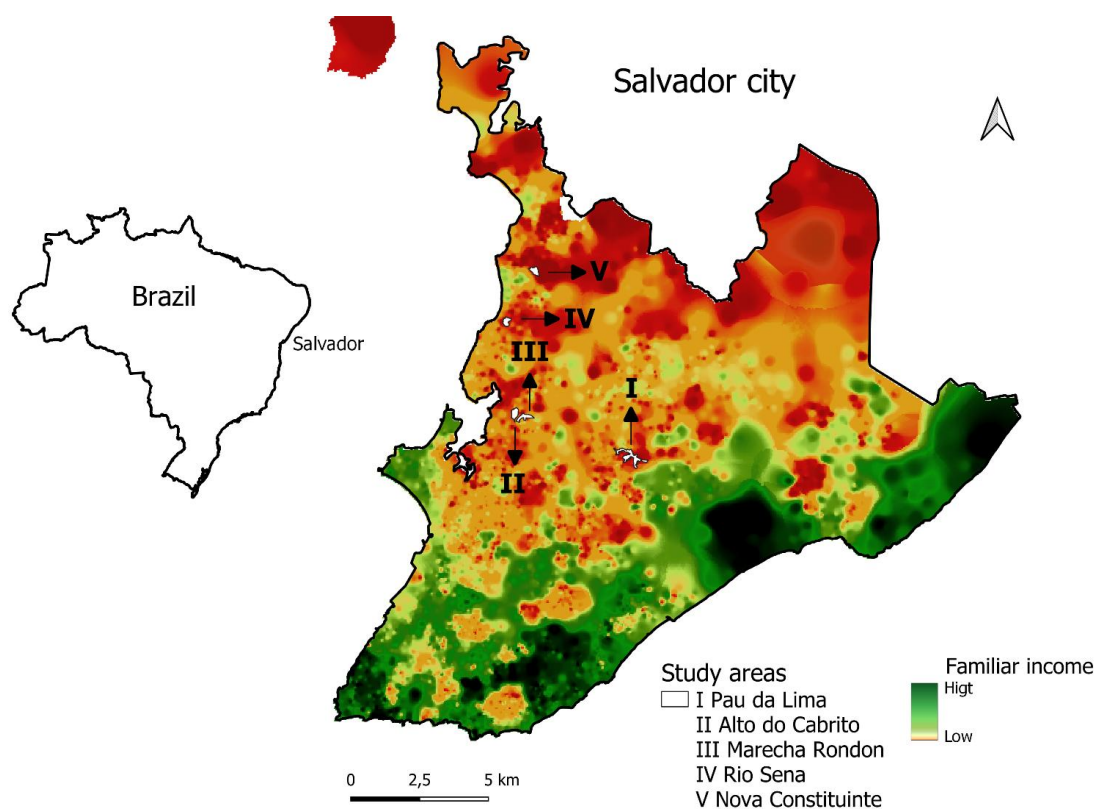

230  
231 Figure 1. Urban communities in the city of Salvador, Brazil. Location of study sites (white)  
232 within the city. Distribution of family income, high (green) and low (orange).  
233  
234

235 The overall unadjusted seroprevalence was 9% (253/2,808) (95% CI 8.0% -  
236 10.1%). Of the 253 infected, 18% (45/253) were seropositive to serogroup Cynopteri  
237 and 82% (208/253) were seropositive to serogroup Icterohaemorrhagiae. Regarding the  
238 distribution of titers, 190/208 (91%) of the samples had titers of 50 to 400, followed by  
239 18/208 (9%) of the samples reacted to titers of 800 and 1600 for serogroup  
240 Icterohaemorrhagiae. For the Cynopteri serogroup, 43/45 (96%) of the samples had  
241 titers of 50 to 400 followed by 2/45 (4%) of the samples reacted to titers of 800 and  
242 6400. Stratifying seroprevalence per area, the seropositivity to serogroup  
243 Icterohaemorrhagiae was lowest in AdC (6.5%) and was highest in RS (7.8%).  
244 Seroprevalence of Cynopteri ranged between 1.0% in NC and 2.1% in MR (Table 1).  
245 Seroprevalence of Icterohaemorrhagiae increased with age group (Fig 2), and females

246 showed less chance to be infected than males (OR 0.69; 95% CI 0.52 – 0.91). This  
247 pattern was not observed for serogroup Cynopteri, which presented higher  
248 seroprevalence in the age group >45 years (Fig 2).

249

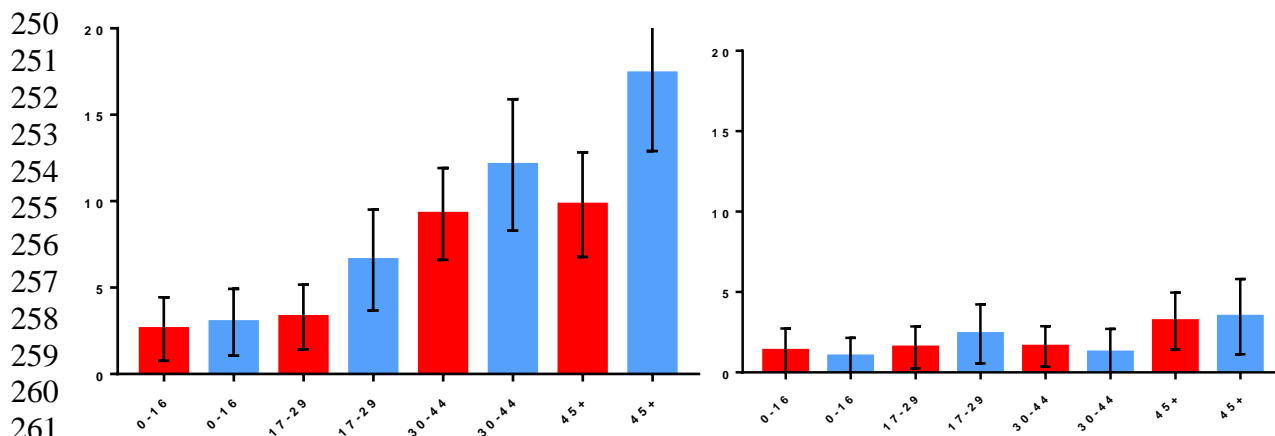

261  
262 Figure 2. Infection rate for *Leptospira interrogans* Icterohaemorrhagiae (A) and *Leptospira*  
263 *kirschneri* Cynopteri (B) by gender and age. Red bars: female. Blue bars: males. Whiskers: 95%  
264 CI.

265

266 The final multivariable multinomial analysis (Table 2) which includes data for  
267 residents > 18 years of age to investigate work-related exposures (n=2,009), identified  
268 the following variables as significantly associated with the serogroup Cynopteri: age in  
269 years (as a quantitative variable) (OR 1.03; 95% CI 1.01-1.06), lives in house with  
270 unplaster walls (exposed brick) (OR 1.68; 95% CI 1.09-2.59) and presence of cats near  
271 the household (OR 2.00; 95% CI 1.03-3.88). In addition, gender (males>females (OR  
272 1.51; 95% CI 1.09-2.10), age in years (OR 1.02; 95% CI 1.01-1.03), work-related  
273 exposures (OR 1.71; 95% CI 1.10-2.66) and contact with sewage (OR 1.42; 95% CI  
274 1.00-2.03) were factors associated to seropositivity against Icterohaemorrhagiae.

275

276 Table 2. Multivariate multinomial regression of seropositivity for *Leptospira kirschneri*  
 277 *Cynopteri* (3522C) and *Leptospira interrogans* Icterohaemorrhagiae (Fiocruz L1-130), n=  
 278 2,009). Note that there were no differences in seropositivity among neighborhoods.  
 279

| Characteristics                                        | Cynopteri<br>(3522C) |           | Icterohaemorrhagiae<br>(Fiocruz L1-130) |           |
|--------------------------------------------------------|----------------------|-----------|-----------------------------------------|-----------|
|                                                        | OR 95 % CI           |           |                                         |           |
| Gender (male)                                          | -                    | -         | 1.51                                    | 1.09-2.10 |
| Age (years)                                            | 1.03                 | 1.01-1.06 | 1.02                                    | 1.01-1.03 |
| Work-related exposures                                 | -                    | -         | 1.71                                    | 1.10-2.66 |
| Contact with sewage                                    | -                    | -         | 1.42                                    | 1.00-2.03 |
| Lives in house with unplaster walls<br>(exposed brick) | 1.68                 | 1.09-2.59 | -                                       | -         |
| <b>Neighborhood</b>                                    |                      |           |                                         |           |
| Alto do Cabrito (reference)                            |                      |           |                                         |           |
| Marechal Rondon                                        | 0.79                 | 0.42-1.47 | 1.54                                    | 0.43-5.46 |
| Nova Constituinte                                      | 0.98                 | 0.51-1.88 | 0.97                                    | 0.21-4.44 |
| Pau da Lima                                            | 1.19                 | 0.74-1.90 | 1.39                                    | 0.46-4.15 |
| Rio Sena                                               | 1.30                 | 0.69-2.45 | 2.46                                    | 0.67-9.10 |
| Cats near the household                                | 2.00                 | 1.03-3.88 | -                                       | -         |

280 Acronyms: OR, odds ratio; 95% IC, Confidence intervals.

281

282 Figure 3 shows differences in spatial patterns of seropositivity between  
 283 serogroups Icterohaemorrhagiae and *Cynopteri* (yellow rectangle indicate Non-  
 284 overlapping Kernel ratio concentration areas between serogroups). The objective of this  
 285 complementary analysis was to verify possible overlaps in the occurrence of spatial  
 286 patterns between serogroups in the territory.



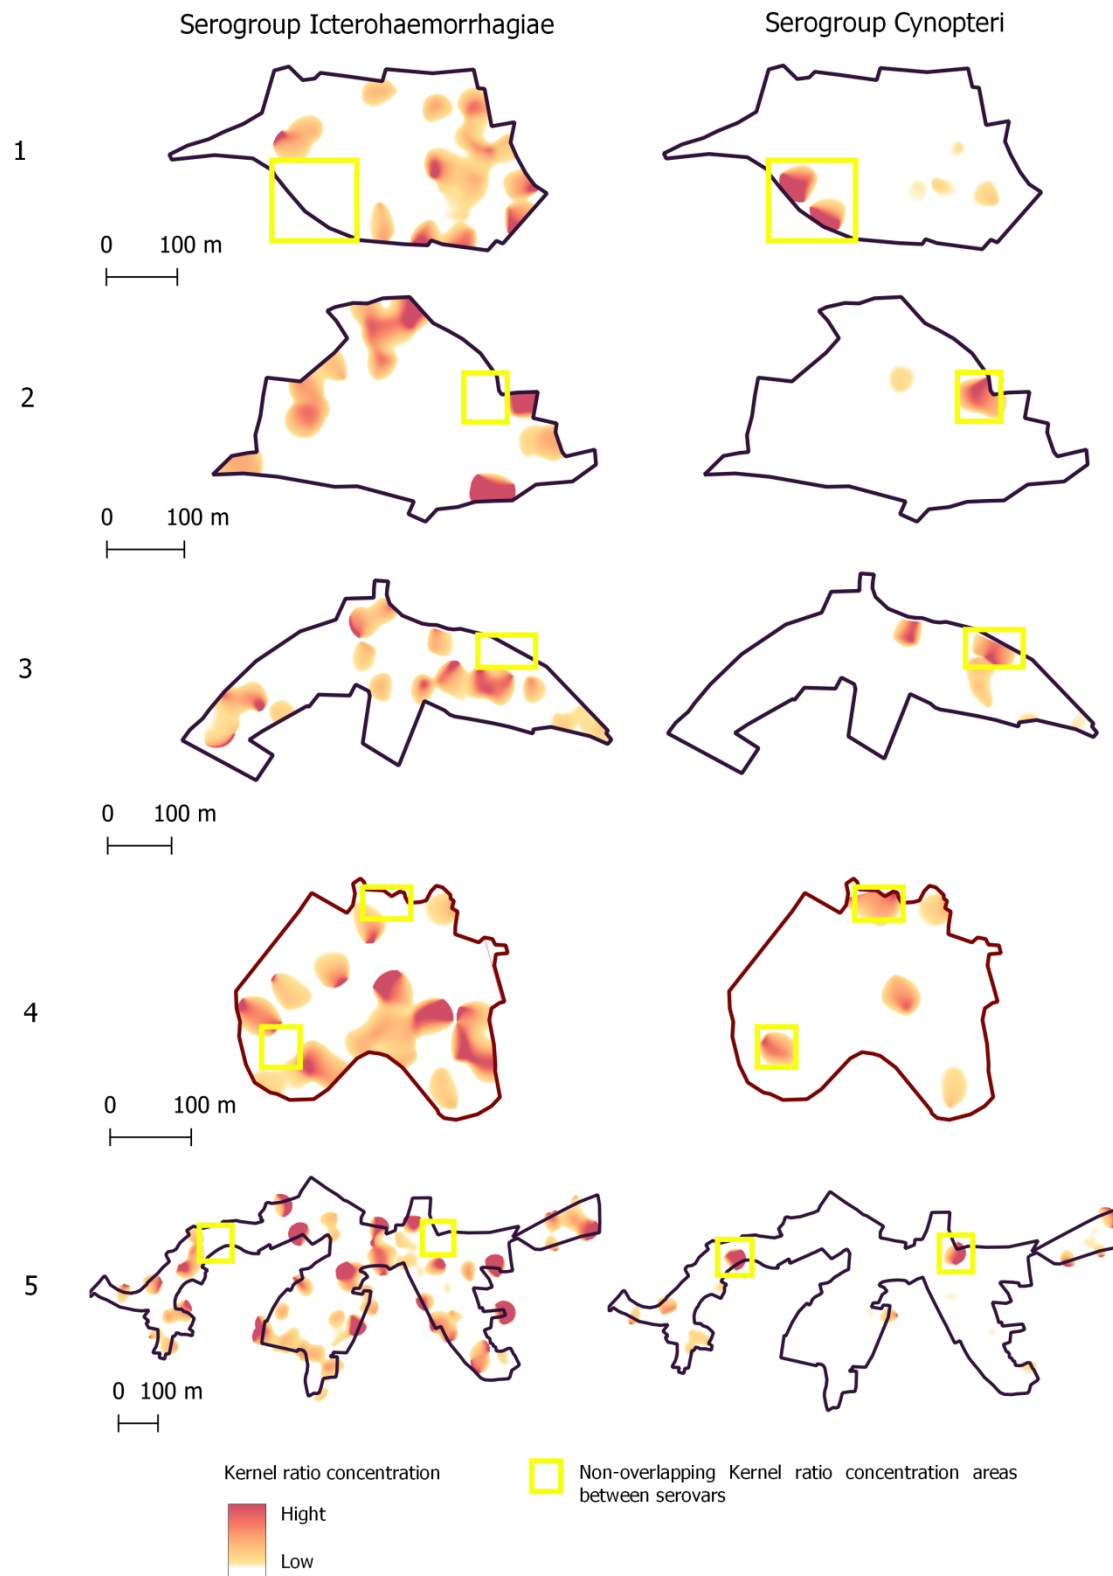

287  
288  
289  
290  
291  
292

Figure 3. Spatial patterns of seropositivity to serogroups' Icterohaemorrhagiae and Cynopteri (yellow rectangle) on five neighborhoods of Salvador, Bahia, Brazil. The light red-to- hard red gradient represents increasing density in smoothing analyses which used 30 meters as the bandwidth.

293

294 **Discussion**

295 Here, we found that of *L. interrogans* serogroup Icterohaemorrhagiae was the  
296 main serogroup responsible for leptospirosis cases in Salvador [12,33]. However, we  
297 also found evidence of local exposure to *L. kirschneri* serogroup Cynopteri in residents  
298 of all communities studied. Prevalence of *L. kirschneri* serogroup Cynopteri, a  
299 serogroup considered pathogenic and for which the reservoir in an urban environment is  
300 not known, was lower than that of *L. interrogans* serogroup Icterohaemorrhagiae.

301 We identified differences in the demographic and socioenvironmental factors  
302 that affect seropositivity for each serogroup. Residents exposed to serogroup Cynopteri  
303 had a distinct demographic profile compared to that of serogroup Icterohaemorrhagiae.  
304 We observed higher seroprevalence for serogroup Cynopteri in ages >45 years for both  
305 genders, suggesting that behavioral differences between men and women do not affect  
306 exposure. However, for serogroup Icterohaemorrhagiae, we found that seropositivity  
307 increased with age, and males were more likely to be seropositive. This relationship  
308 between age and exposure to Icterohaemorrhagiae is similar to that observed in previous  
309 studies [16].

310 Occupation-related factors were associated with exposure to serogroup  
311 Icterohaemorrhagiae. Individuals who engaged in activities involving solid waste  
312 management, or contact with mud, floodwaters and/or sewage, were more likely to be  
313 seropositive. This is in line with previous results from these and similar communities,  
314 where leptospirosis is associated to work-related exposures, including occupations like  
315 subsistence farming [3]. Further, inhabitants of low-income communities are commonly  
316 enrolled in informal employment, often close to their households, highlighting the role  
317 of the environment as an important source for transmission. Interestingly, we did not  
318 detect any independent associations between work-related risk exposures and serogroup

319 Cynopteri, maybe because have a lower number of individuals seropositive for  
320 Cynopteri.

321 Little is known about the animal and environmental reservoirs for serogroup  
322 Cynopteri. In our final model, we detected a positive association of individuals between  
323 anti-Cynopteri antibodies and the presence of cats in the household. Although there is a  
324 report on the occurrence of this serogroup in wild animals such as bats [34], there are  
325 also indications that cats can be exposed to *Leptospira* and higher seroprevalence of  
326 serogroup Cynopteri has been found in cats from Spain compared to other serogroups  
327 studied [35].

328 Among the domestic and peri-domiciliary variables, the presence of open  
329 sewage near the home was associated with greater seropositivity for serogroup  
330 Icterohaemorrhagiae. This result is consistent with a previous study [19] in which  
331 “living near an open sewer” was a factor associated with seropositivity. This further  
332 suggests that environmental exposure is an important route of indirect transmission, and  
333 it should be noted that animals other than rats can release leptospires through urine into  
334 the environment. This association has also been reported in other epidemiological  
335 studies [31,32]. In a previous study, in the same study area, it was identified that, in  
336 addition to sewage, the presence of pond water on the ground, from rainwater  
337 accumulations, can be a source of pathogenic *Leptospira* [36].

338 Infrastructure deficiencies in homes, for example, living in a house with  
339 unplaster walls (exposed brick), has also been considered a source of transmission for  
340 repeated exposures to *Leptospira* [19]. This may mean that risk factors for peri-  
341 domiciliary exposure may also be important for infection by serogroup Cynopteri. We  
342 believe that the structural precariousness in the household could be an indicator of low  
343 socioeconomic status, as suggested in another study [24].

344 It is possible that different spatial niches of reservoirs occur for serogroups  
345 Icterohaemorrhagiae and Cynopteri in urban areas, as a difference in spatial  
346 concentration patterns was observed in the analysis of the Kernel ratio (Figure 3) for the  
347 occurrence of these serogroups in the five neighborhoods evaluated. There was low  
348 overlap in human case concentration patterns for the serogroups, possibly because  
349 serogroup Icterohaemorrhagiae is associated with proximity to sewers and Cynopteri  
350 with the presence of cats, as demonstrated by statistical analysis. However, these  
351 investigations are limited by the fact that MAT is the standard test used in prevalence  
352 surveys, but this serological analysis does not actually indicate that the individual has  
353 acute disease. Additionally, we had a low prevalence of Cynopteri, which might not be  
354 possible to understand the true epidemiological pattern. Future studies may deepen to  
355 evaluate spatial correlations between the occurrence of serogroups and the abundance  
356 and mobility of rodents or felines and proximity by households.

357

## 358 **Conclusion**

359 Our data show different exposure risk for different serogroups, with possible  
360 different spatial territorial niches of reservoirs, which can potentially indicate different  
361 epidemiology or transmission pathways. Further, our findings indicate cats were  
362 associated to seropositivity for serogroup Cynopteri in residents of the communities  
363 studied. Our results can serve as base for future studies in One Health approach that can  
364 elucidate the role of synanthropic, wild animals, and environment in the transmission of  
365 serogroup Cynopteri in urban areas, in addition to contributing to the orientation of  
366 public health measures to prevent future infections.

367

## 368 **Acknowledgments**

369 The authors would like to thank the individuals from the communities who participated  
370 in this study.

371

372 **Author Contributions**

373 Conceived and designed the experiments: FC, DO, HK, MB, AIK, MGR, YAL.

374 Performed the experiments: FC, DO, HK, FAGP, RS, GAS, JC, FAGP, EAWJ.

375 Analyzed the data: DO, HK, JCQ, NNJ, CGZ, ISF. Contributed

376 reagents/materials/analysis tools: FC, DO, AIK, HK, MGR, MB, PJD, EAWJ, YAL, R,

377 NNJ. Wrote the paper: DO, FC, MGR, HK, EAWJ, CGZ, JC, YAL, NNJ, RL, AIK,

378 MB, FAGP, TCP.

379

380 **References**

381

382 1. Ko AI, Goarant C, Picardeau M. *Leptospira*: the dawn of the molecular genetics

383 era for an emerging zoonotic pathogen. *Nat Rev Microbiol.* 2009;7: 736–747.

384 doi:10.1038/nrmicro2208

385 2. Bharti AR, Nally JE, Ricaldi JN, Matthias MA, Diaz MM, Lovett MA, et al.

386 *Leptospirosis*: A zoonotic disease of global importance. *Lancet Infect Dis.*

387 2003;3: 757–771. doi:10.1016/S1473-3099(03)00830-2

388 3. McBride AJA, Athanazio DA, Reis MG, Ko AI. *Leptospirosis*. *Trop Travel Dis.*

389 2005;18: 376–386.

390 4. Costa F, Hagan JE, Calcagno J, Kane M, Torgerson P, Martinez-Silveira MS, et

391 al. Global morbidity and mortality of leptospirosis: a systematic review. *PLoS*

392 *Negl Trop Dis.* 2015; 1–19. doi:10.1371/journal.pntd.0003898

393 5. Goarant C. *Leptospirosis*: risk factors and management challenges in developing

394 countries. *Res Rep Trop Med.* 2016;Volume 7: 49–62. doi:10.2147/rrtm.s102543

395 6. Bierque E, Thibeaux R, Girault D, Soupé-Gilbert ME, Goarant C. A systematic

396 review of *Leptospira* in water and soil environments. *PLoS One.* 2020;15: 1–22.

397 doi:10.1371/journal.pone.0227055

398 7. Picardeau M. Virulence of the zoonotic agent of leptospirosis: Still terra

399 incognita? *Nat Rev Microbiol.* 2017;15: 297–307. doi:10.1038/nrmicro.2017.5

400 8. Vincent AT, Schiettekatte O, Goarant C, Neela VK, Bernet E, Thibeaux R, et al.

401 Revisiting the taxonomy and evolution of pathogenicity of the genus *Leptospira*

402 through the prism of genomics. *PLoS Negl Trop Dis.* 2019;13: e0007270.

403 doi:10.1371/journal.pntd.0007270

404 9. Casanovas-Massana A, Hamond C, Santos LA, de Oliveira D, Hacker KP,

405 Balassiano I, et al. *Leptospira yasudae* sp. Nov. and *Leptospira stimsonii* sp. nov.,

- 406 two new species of the pathogenic group isolated from environmental sources.
- 407 Int J Syst Evol Microbiol. 2019;70: 1450–1456. doi:10.1099/ijsem.0.003480
- 408 10. Picardeau M. Diagnosis and epidemiology of leptospirosis. *Médecine Mal Infect.*
- 409 2013;43: 1–9. doi:10.1016/S0992-5945(17)30102-2
- 410 11. Faine S, Adler B, Bolin C, Perolat P. *Leptospira and Leptospirosis*. 2<sup>a</sup> ed.
- 411 MediSci. Melbourne, Australia; 1999.
- 412 12. Ko AI, Reis MG, Dourado CMR, Johnson Jr WD, Riley LW. Urban epidemic of
- 413 severe leptospirosis in Brazil. *Lancet.* 1999;354: 820–825. Available:
- 414 <http://www.ncbi.nlm.nih.gov/pubmed/10485724>
- 415 13. Hacker KP, Sacramento GA, Cruz JS, De Oliveira D, Nery N, Lindow JC, et al.
- 416 Influence of rainfall on leptospira infection and disease in a tropical urban
- 417 setting, Brazil. *Emerg Infect Dis.* 2020;26: 311–314.
- 418 doi:10.3201/eid2602.190102
- 419 14. Trevejo RT, Rigau-Pérez JG, Ashford DA, McClure EM, Jarquín-González C,
- 420 Amador JJ, et al. Epidemic Leptospirosis Associated with Pulmonary
- 421 Hemorrhage—Nicaragua, 1995. *J Infect Dis.* 1998;178: 1457–1463.
- 422 doi:10.1086/314424
- 423 15. Amilasan AST, Ujiie M, Suzuki M, Salva E, Belo MCP, Koizumi N, et al.
- 424 Outbreak of leptospirosis after flood, the Philippines, 2009. *Emerg Infect Dis.*
- 425 2012;18: 91–94. doi:10.3201/eid1801.101892
- 426 16. Reis RB, Ribeiro GS, Felzemburgh RDM, Santana FS, Mohr S, Melendez
- 427 AXTO, et al. Impact of environment and social gradient on *Leptospira* infection
- 428 in urban slums. *PLoS Negl Trop Dis.* 2008;2: 11–18.
- 429 doi:10.1371/journal.pntd.0000228
- 430 17. UN-HABITAT. Streets as public spaces and drivers of urban prosperity. 2013.

- 431 18. UN-HABITAT. State of the World's Cities 2010/2011: Bridging The Urban  
432 Divide. In: Earthscan, GB. 2010 p. 224.
- 433 19. SANTOS M. A urbanização brasileira. Ed. Hucite. São Paulo; 1993.
- 434 20. SPINK MJP. Viver em áreas de risco: reflexões sobre vulnerabilidades  
435 socioambientais. EDUC: Terc. São Paulo; 2018.
- 436 21. Felzemburgh RDM, Ribeiro GS, Costa F, Reis RB, Hagan JE, Melendez AXTO,  
437 et al. Prospective Study of Leptospirosis Transmission in an Urban Slum  
438 Community: Role of Poor Environment in Repeated Exposures to the Leptospira  
439 Agent. PLoS Negl Trop Dis. 2014;8: 1–9. doi:10.1371/journal.pntd.0002927
- 440 22. Hagan JE, Moraga P, Costa F, Capian N, Ribeiro GS, Wunder EA, et al.  
441 Spatiotemporal determinants of urban leptospirosis transmission: Four-year  
442 prospective cohort study of slum residents in Brazil. PLoS Negl Trop Dis.  
443 2016;10: 1–16. doi:doi:10.1371/journal.pntd.0004275
- 444 23. Costa F, Porter FH, Rodrigues G, Farias H, de Faria MT, Wunder E a, et al.  
445 Infections by *Leptospira interrogans*, Seoul virus, and *Bartonella* spp. among  
446 Norway rats (*Rattus norvegicus*) from the urban slum environment in Brazil.  
447 Vector borne zoonotic Dis. 2014;14: 33–40. doi:10.1089/vbz.2013.1378
- 448 24. Costa F, Ribeiro GS, Felzemburgh RDM, Santos N, Reis RB, Santos AC, et al.  
449 Influence of Household Rat Infestation on *Leptospira* Transmission in the Urban  
450 Slum Environment. PLoS Negl Trop Dis. 2014;8: 1–8.  
451 doi:10.1371/journal.pntd.0003338
- 452 25. Khalil H, Santana R, de Oliveira D, Palma F, Lustosa R, Eyre MT, et al. Poverty,  
453 sanitation, and leptospira transmission pathways in residents from four Brazilian  
454 slums. PLoS Negl Trop Dis. 2021;15: 1–15. doi:10.1371/journal.pntd.0009256
- 455 26. Silverman B. Estimativa de densidade para estatísticas e análise de dados.



- 456 Chapman & Hall, Londres; 1986.
- 457 27. Gómez Villafaña IE, Muschetto E, Busch M. Movements of Norway rats (*Rattus*  
458 *norvegicus*) in two poultry farms, Exaltación de la Cruz, Buenos Aires,  
459 Argentina. *Mastozoología Neotrop.* 2008;15: 203–208.
- 460 28. Hagan JE, Moraga P, Costa F, Capian N, Ribeiro GS, Wunder EA, et al.  
461 Spatiotemporal Determinants of Urban Leptospirosis Transmission: Four-Year  
462 Prospective Cohort Study of Slum Residents in Brazil. *PLoS Negl Trop Dis.*  
463 2016;10: 1–16. doi:10.1371/journal.pntd.0004275
- 464 29. RStudio: Integrated Development for R. RStudio, PBC, Boston M. RStudio  
465 Team. 2020. Available: <http://www.rstudio.com/>
- 466 30. Team RC. R: A language and environment for statistical computing. Foundation  
467 for Statistical Computing. Vienna, Austria; 2019. Available: [https://www.r-](https://www.r-project.org/)  
468 [project.org/](https://www.r-project.org/)
- 469 31. Venables W, Ripley B. *Modern Applied Statistics with S.* New York; 2002.  
470 Available: <https://www.stats.ox.ac.uk/pub/MASS4/>
- 471 32. D B, M M, B B, S W. Fitting Linear Mixed-Effects Models Using lme4. *J Stat*  
472 *Softw.* 2015;67: 1–48. doi:10.18637/jss.v067.i01
- 473 33. Barocchi MA, Ko AI, Ferrer SR, Faria MT, Reis MG, Riley LW. Identification of  
474 New Repetitive Element in *Leptospira interrogans* Serovar Copenhageni and Its  
475 Application to PCR-Based Differentiation of *Leptospira* Serogroups. *Clin*  
476 *Microbiol.* 2001;39: 191–195. doi:10.1128/JCM.39.1.191
- 477 34. Matthias MA, Campos KJ, Calderon M, Willig MR, Pacheco V, Gotuzzo E, et al.  
478 Diversity of bat-associated *Leptospira* in the peruvian amazon inferred by  
479 bayesian phylogenetic analysis of 16s ribosomal DNA sequences. *Am Soc Trop*  
480 *Med Hyg Divers.* 2005;73: 964–974.

- 481 35. Murillo A, Cuenca R, Serrano E, Marga G, Ahmed A, Cervantes S, et al.  
482 Leptospira detection in cats in Spain by serology and molecular techniques. Int J  
483 Environ Res Public Health. 2020;17. doi:10.3390/ijerph17051600
- 484 36. Casanovas-Massana A, Costa F, Riediger IN, Cunha M, Oliveira D de, Mota DC,  
485 et al. Spatial and temporal dynamics of pathogenic Leptospira in surface waters  
486 from the urban slum environment. Water Res. 2018;130: 176–184.  
487 doi:10.1016/j.watres.2017.11.068
- 488
- 489

490 Table S1. Bivariate models for seroprevalence of *Leptospira kirschneri* Cynopteri (3522C) and  
 491 *Leptospira interrogans* Icterohaemorrhagiae (Fiocruz L1-130).  
 492

| Characteristic        | Cynopteri<br>(3522C) |                 |                     | Icterohaemorrhagiae<br>(Fiocruz L1-130) |                 |                     |
|-----------------------|----------------------|-----------------|---------------------|-----------------------------------------|-----------------|---------------------|
|                       | N                    | OR <sup>1</sup> | 95% CI <sup>1</sup> | N                                       | OR <sup>1</sup> | 95% CI <sup>1</sup> |
| <b>Individual</b>     |                      |                 |                     |                                         |                 |                     |
| Median Age (years)    | 2,600                | 1.03            | 1.02, 1.05          | 2,763                                   | 1.03            | 1.02, 1.04          |
| Sex                   | 2,600                |                 |                     | 2,763                                   |                 |                     |
| Male                  |                      | —               | —                   |                                         | —               | —                   |
| Female                |                      | 1.07            | 0.59, 1.99          |                                         | 0.69            | 0.52, 0.91          |
| Ethnicity             | 2,562                |                 |                     | 2,724                                   |                 |                     |
| Brown                 |                      | —               | —                   |                                         | —               | —                   |
| Black                 |                      | 0.86            | 0.47, 1.58          |                                         | 0.97            | 0.72, 1.30          |
| White                 |                      | 0.36            | 0.02, 1.75          |                                         | 1.21            | 0.64, 2.11          |
| Others                |                      | 0               |                     |                                         | 0               |                     |
| Education             | 2,600                |                 |                     | 2,763                                   |                 |                     |
| 5 or less             |                      | —               | —                   |                                         | —               | —                   |
| 5 to 9                |                      | 0.6             | 0.26, 1.34          |                                         | 1.09            | 0.76, 1.57          |
| 10 to 12              |                      | 0.75            | 0.35, 1.61          |                                         | 0.95            | 0.66, 1.38          |
| Higher Education      |                      | 0.86            | 0.05, 4.40          |                                         | 0.43            | 0.07, 1.43          |
| Never studied         |                      | 3.64            | 1.35, 8.98          |                                         | 1.43            | 0.69, 2.73          |
| Employment            | 2,600                |                 |                     | 2,763                                   |                 |                     |
| No                    |                      | —               | —                   |                                         | —               | —                   |
| Yes                   |                      | 0.87            | 0.45, 1.62          |                                         | 1.73            | 1.30, 2.29          |
| Risk occupation       | 2,600                |                 |                     | 2,763                                   |                 |                     |
| No                    |                      | —               | —                   |                                         | —               | —                   |
| Yes                   |                      | 0.96            | 0.23, 2.67          |                                         | 2.72            | 1.81, 3.99          |
| <b>Risk exposures</b> |                      |                 |                     |                                         |                 |                     |
| Walk barefoot         | 2,599                |                 |                     | 2,762                                   |                 |                     |
| No                    |                      | —               | —                   |                                         | —               | —                   |
| Yes                   |                      | 0.75            | 0.39, 1.39          |                                         | 0.88            | 0.65, 1.18          |
| Use of boots          | 2,597                |                 |                     | 2,760                                   |                 |                     |
| No                    |                      | —               | —                   |                                         | —               | —                   |
| Yes                   |                      | 0.75            | 0.30, 1.58          |                                         | 1.22            | 0.86, 1.69          |
| Cleaned sewage        | 2,286                |                 |                     | 2,448                                   |                 |                     |
| No                    |                      | —               | —                   |                                         | —               | —                   |
| Yes                   |                      | 1.3             | 0.44, 3.05          |                                         | 2.55            | 1.75, 3.65          |
| Sewage contact        | 2,599                |                 |                     | 2,762                                   |                 |                     |
| No                    |                      | —               | —                   |                                         | —               | —                   |
| Yes                   |                      | 1.38            | 0.68, 2.62          |                                         | 1.4             | 1.01, 1.92          |
| Open sewer            | 2,598                |                 |                     | 2,761                                   |                 |                     |
| No                    |                      | —               | —                   |                                         | —               | —                   |
| Yes                   |                      | 1.32            | 0.71, 2.40          |                                         | 1.26            | 0.94, 1.69          |

|                                             |       |      |            |       |      |            |
|---------------------------------------------|-------|------|------------|-------|------|------------|
| Access to the house is paved?               | 2,600 |      |            | 2,763 |      |            |
| No                                          |       | —    | —          |       | —    | —          |
| Yes                                         |       | 1.03 | 0.54, 2.14 |       | 1.03 | 0.74, 1.44 |
| Wall material?                              | 2,600 |      |            | 2,763 |      |            |
| No                                          |       | —    | —          |       | —    | —          |
| Yes                                         |       | 1.1  | 0.38, 2.57 |       | 1.6  | 1.06, 2.36 |
| <b>Presence of animals in the household</b> |       |      |            |       |      |            |
| Presence of Cats                            | 2,600 |      |            | 2,763 |      |            |
| No                                          |       | —    | —          |       | —    | —          |
| Yes                                         |       | 1.89 | 1.01, 3.44 |       | 1.09 | 0.78, 1.50 |
| Presence of Dogs                            | 2,600 |      |            | 2,763 |      |            |
| No                                          |       | —    | —          |       | —    | —          |
| Yes                                         |       | 0.86 | 0.45, 1.57 |       | 0.94 | 0.70, 1.25 |
| Presence of Chickens                        | 2,600 |      |            | 2,763 |      |            |
| No                                          |       | —    | —          |       | —    | —          |
| Yes                                         |       | 1.46 | 0.35, 4.09 |       | 1.71 | 0.96, 2.85 |

<sup>1</sup>OR = Odds Ratio, CI = Confidence Interval
